# Supplementary material for: Microfluidic flow confinement to avoid chemotaxis-based upstream growth in a biofilm flow cell reactor
Source: Royal Society of Chemistry journal article supplement (doi:10.1039/c8ay01513a), 2018-01-01
Supplement: c8ay01513a1.pdf [file c8ay01513a1.pdf]

## Microfluidic flow confinement to avoid chemotaxis-based upstream growth in a biofilm flow cell reactor

Farnaz Asayesh,<sup>1</sup> Mir Pouyan Zarabadi,<sup>1</sup> Nahid Babaei Aznaveh<sup>1</sup> and Jesse Greener<sup>1,2\*</sup>

<sup>1</sup> Département de Chimie, Faculté des sciences et de génie, Université Laval, Québec City, QC, Canada.

<sup>2</sup> CHU de Québec, centre de recherche, Université Laval, 10 rue de l'Espinay, Québec, QC, Canada.

\* E-mail : [jesse.greener@chm.ulaval.ca](mailto:jesse.greener@chm.ulaval.ca)

### Electronic supporting information:

In brief, a typical experiment included 3 different growth phases, as controlled by the microfluidic system. They include an inoculation phase (phase<sub>i</sub>), a downstream growth phase (phase<sub>d</sub>) and an upstream growth phase (phase<sub>u</sub>). Table 1 (main paper) includes the details of the solution conditions applied to the inlets during each growth phase. During phase<sub>i</sub> and phase<sub>d</sub>, inoculant solution and a nutrient solution, respectively, were added to I<sub>1</sub>, while a confinement solution was applied to I<sub>2</sub>. As the confinement solution (I<sub>2</sub>) did not contain any nutrient source, bacteria were prevented from colonizing the portions of the channel that were upstream of I<sub>1</sub>. In this approach bacteria were confined to the downstream portions of the microchannel between I<sub>1</sub> and O. Increased velocity and shear forces in the neck, could have also prevented random swimming of planktonic bacteria into the confinement stream. However, since such bacteria could not grow due to the lack of nutrients, even if some did swim upstream high resolution microscopy would have been required to detect their presence. Instead, during phase<sub>u</sub>, we applied a nutrient solution to I<sub>2</sub> and stopped the flow into I<sub>1</sub> after a visible biofilm was observed in measurement area 2. The nutrient solution throughout the microbioreactor provided both an incentive for planktonic bacteria to try to move to uncolonized upstream portions, and provided the necessary

nutrients to enable subsequent biofilm growth in the measurement channel. Using low-resolution microscope imaging throughout the channel biofilm growth could be observed as an indicator of the success of the hydrodynamic confinement from the neck. We ran 4 separate experiments with different volumetric flow rates applied to  $I_1$  and  $I_2$  ( $Q_1$  and  $Q_2$ , respectively) as summarized in Table 1 (main paper). The volumetric flow rate  $Q_2$  used during phase<sub>u</sub> is highlighted (bold box) as the critical parameter for achieving the effect of hydrodynamic isolation between the measurement area and head area via the neck constriction feature. This is the value that is reported as  $Q_2$  in the main paper, section “Measurement of optical density for biofilm growth”.

Table S1. Volumetric flow rates for experiments 1-4 in Figure 6.

| Experiment number | Flow rate | Phase <sub>i</sub> | Phase <sub>d</sub> | Phase <sub>u</sub> |
|-------------------|-----------|--------------------|--------------------|--------------------|
| (a)               | $Q_1$     | 0.3                | 0.3                | 0                  |
|                   | $Q_2$     | 0.3                | 0.6                | 0.3                |
| (b)               | $Q_1$     | 0.3                | 0.3                | 0                  |
|                   | $Q_2$     | 0.3                | 0.6                | 1                  |
| (c)               | $Q_1$     | 0.3                | 0.3                | 0                  |
|                   | $Q_2$     | 0.3                | 0.6                | 3                  |
| (d)               | $Q_1$     | 0.3                | 0.3                | 0                  |
|                   | $Q_2$     | 0.3                | 0.6                | 4                  |

The corresponding velocity and shear force during the phase<sub>u</sub> are the critical parameters in determining the ability to achieve the desired hydrodynamic confinement. Using relevant flow

rates in Table S1 along with equations 1 and 2, we show in Tables S2 and S3 the calculated  $v_{1,2,3}$  and  $\tau_{1,2,3}$  (respectively) as defined in Figure 3 (main paper).

Table S2. Calculated velocities during upstream growth phase, phase<sub>u</sub>.

| Phase <sub>u</sub> , Q <sub>1</sub> (mL/h) | $v_h$ (mm/s) | $v_n$ (mm/s) | $v_m$ (mm/s) |
|--------------------------------------------|--------------|--------------|--------------|
| 0.3                                        | 0.83         | 6.6          | 0.83         |
| 1                                          | 2.7          | 22.0         | 2.7          |
| 3                                          | 8.3          | 66.0         | 8.3          |
| 4                                          | 11.0         | 88.0         | 11.0         |

Table S3. Calculated shear force during upstream growth phase.

| Phase <sub>u</sub> Q <sub>1</sub> (mL/h) | $\tau_h$ (Pa) | $\tau_n$ (Pa) | $\tau_m$ (Pa) |
|------------------------------------------|---------------|---------------|---------------|
| 0.3                                      | 0.099         | 0.799         | 0.099         |
| 1                                        | 2.65          | 0.33          | 2.65          |
| 3                                        | 0.99          | 7.99          | 0.99          |
| 4                                        | 1.33          | 10.65         | 1.33          |

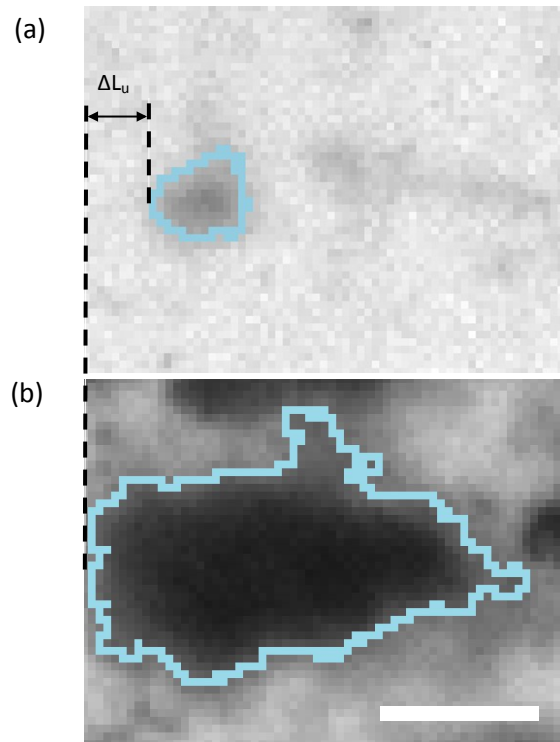

**Figure S1** expansion of a biofilm colony in a microchannel in a downstream portion of the channel after 10 hours (a) and 25 hours (b). Blue borders accentuate the outer edge of the biofilm colony. The upstream change in length ( $\Delta L_u$ ) is shown as the displacement of the trailing edge in the upstream direction. Flow was from left to right. Scale bar is 100  $\mu\text{m}$ .
